# Supplementary material for: Antioxidative, Anti-Inflammatory, and Anticancer Effects of Purified Flavonol Glycosides and Aglycones in Green Tea
Source: PubMed Central journal article supplement (PMC6719943; doi:10.3390/antiox8080278), 2019-08-05
Supplement: antioxidants-08-00278-s001.pdf [file antioxidants-08-00278-s001.pdf]

# Antioxidative, Anti-inflammatory, and Anticancer Effects of Purified Flavonol Glycosides and Aglycones in Green Tea

Chan-Su Rha <sup>1</sup>, Hyun Woo Jeong <sup>1</sup>, Saitbyul Park <sup>2</sup>, Siyoung Lee <sup>3</sup>, Young Sung Jung <sup>4</sup>, and Dae-Ok Kim <sup>4,\*</sup>

<sup>1</sup> Vitalbeautie Research Division, Amorepacific Corporation R&D Center, Yongin 17074, Republic of Korea

<sup>2</sup> Safety and Regulatory Division, Amorepacific Corporation R&D Center, Yongin 17074, Republic of Korea

<sup>3</sup> Precision Medicine Research Center, Advanced Institutes of Convergence Technology, Suwon 16229, Republic of Korea

<sup>4</sup> Department of Food Science and Biotechnology, Kyung Hee University, Yongin 17104, Republic of Korea

\* Correspondence: DOKIM05@khu.ac.kr; Tel.: +82-31-201-3796

## qPCR protocol

To perform qPCR assay, synthesized cDNAs (3  $\mu$ L) were mixed with Quantispeed SYBR NO-ROX premix solution (10  $\mu$ L; PhileKorea, Seoul, Republic of Korea), appropriate qPCR primers (2  $\mu$ L; additional information is shown in Table S1) and distilled water (5  $\mu$ L). PCR assay was conducted as follows;

**Table S1.** qPCR mix and reaction condition.

| Step                         | Temperature | Time  | Comment           |
|------------------------------|-------------|-------|-------------------|
| Initialize                   | 95 °C       | 2 min |                   |
| Denature                     | 95 °C       | 20 s  |                   |
| Primer annealing / extension | 60 °C       | 15 s  | × 40 cycles       |
| Melt Curve                   | 60 °C–95 C° | 5 s   | $\Delta$ T 0.5 °C |

**Table S2.** Sequences of qPCR primers.

| Gene         | Forward                  | Reverse                   |
|--------------|--------------------------|---------------------------|
| Cyclophilin  | CAGACGCCACTGTCGCTTT      | TGTCTTTGGAACCTTTGTCTGCAA  |
| IL-1 $\beta$ | TGCAGAGTTCCCAACTGGTACATC | GTGCTGCCTAATGTCCCCTTGAATC |
| IL-6         | AGTTGCCTTCTTGGGACTGA     | TCCACGATTTCCCAGAGAAC      |
| iNOS         | AATCTTGGAGCGAGTTGTGG     | CAGGAAGTAGGTGAGGGCTTG     |
| COX-2        | AGAAGGAAATGGCTGCAGAA     | GCTCGGCTTCCAGTATTGAG      |
| MMP9         | CGACGACGACGAGTTGTG       | CATGGGGCACCATTTGAGTT      |

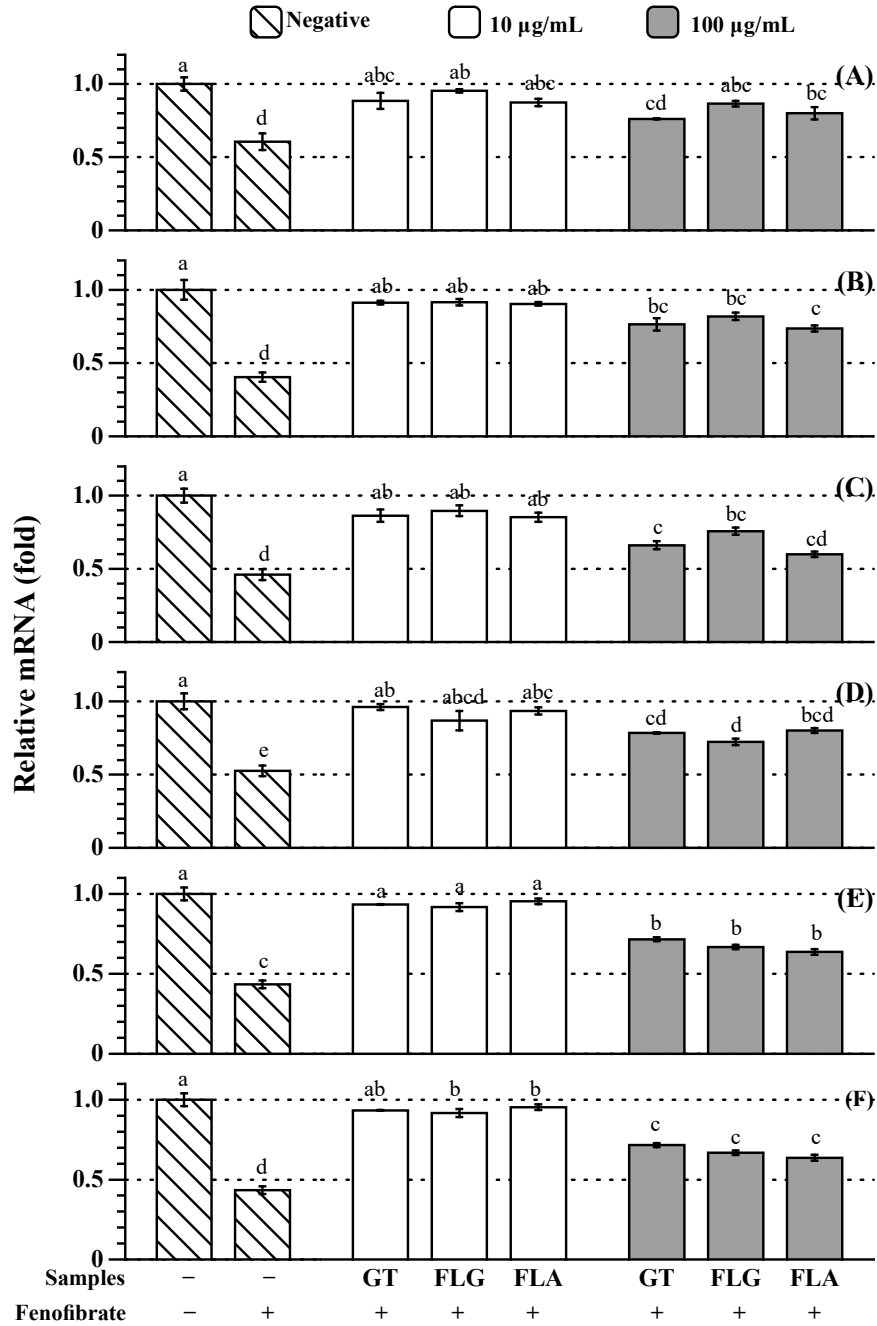

**Figure S1.** Modulating effects on lipid metabolism related genes in 3T3-L1. Genes: (A), SREBP1c (sterol regulatory element-binding proteins 1c); (B), ACC (acetyl-CoA carboxylase); (C), FAS (fatty acid synthase); (D), SCD1 (stearyl-CoA dehydrogenase 1); (E) aP2 (adipocyte protein 2); (F), CD36 (cluster of differentiation 36). Different letters on the bars indicate significant differences according to the Tukey-Kramer Honestly Significant Difference test ( $p < 0.05$ ).
